# Supplementary material for: Differentially Deregulated MicroRNAs as Novel Biomarkers for Neoplastic Progression in Ulcerative Colitis
Source: PubMed Central journal article supplement — Clin Transl Gastroenterol. 2022 Apr 8;13(7):e00489. doi: 10.14309/ctg.0000000000000489 (PMC10476842; doi:10.14309/ctg.0000000000000489), 2022-04-08
Supplement: ct9-13-e00489-s005.pdf [file ct9-13-e00489-s005.pdf]

**microRNA expression**

**UC-Dys vs. UC-NM**

**UC-CRC vs. UC-NM**

**Sp-CRC vs. UC-CRC**

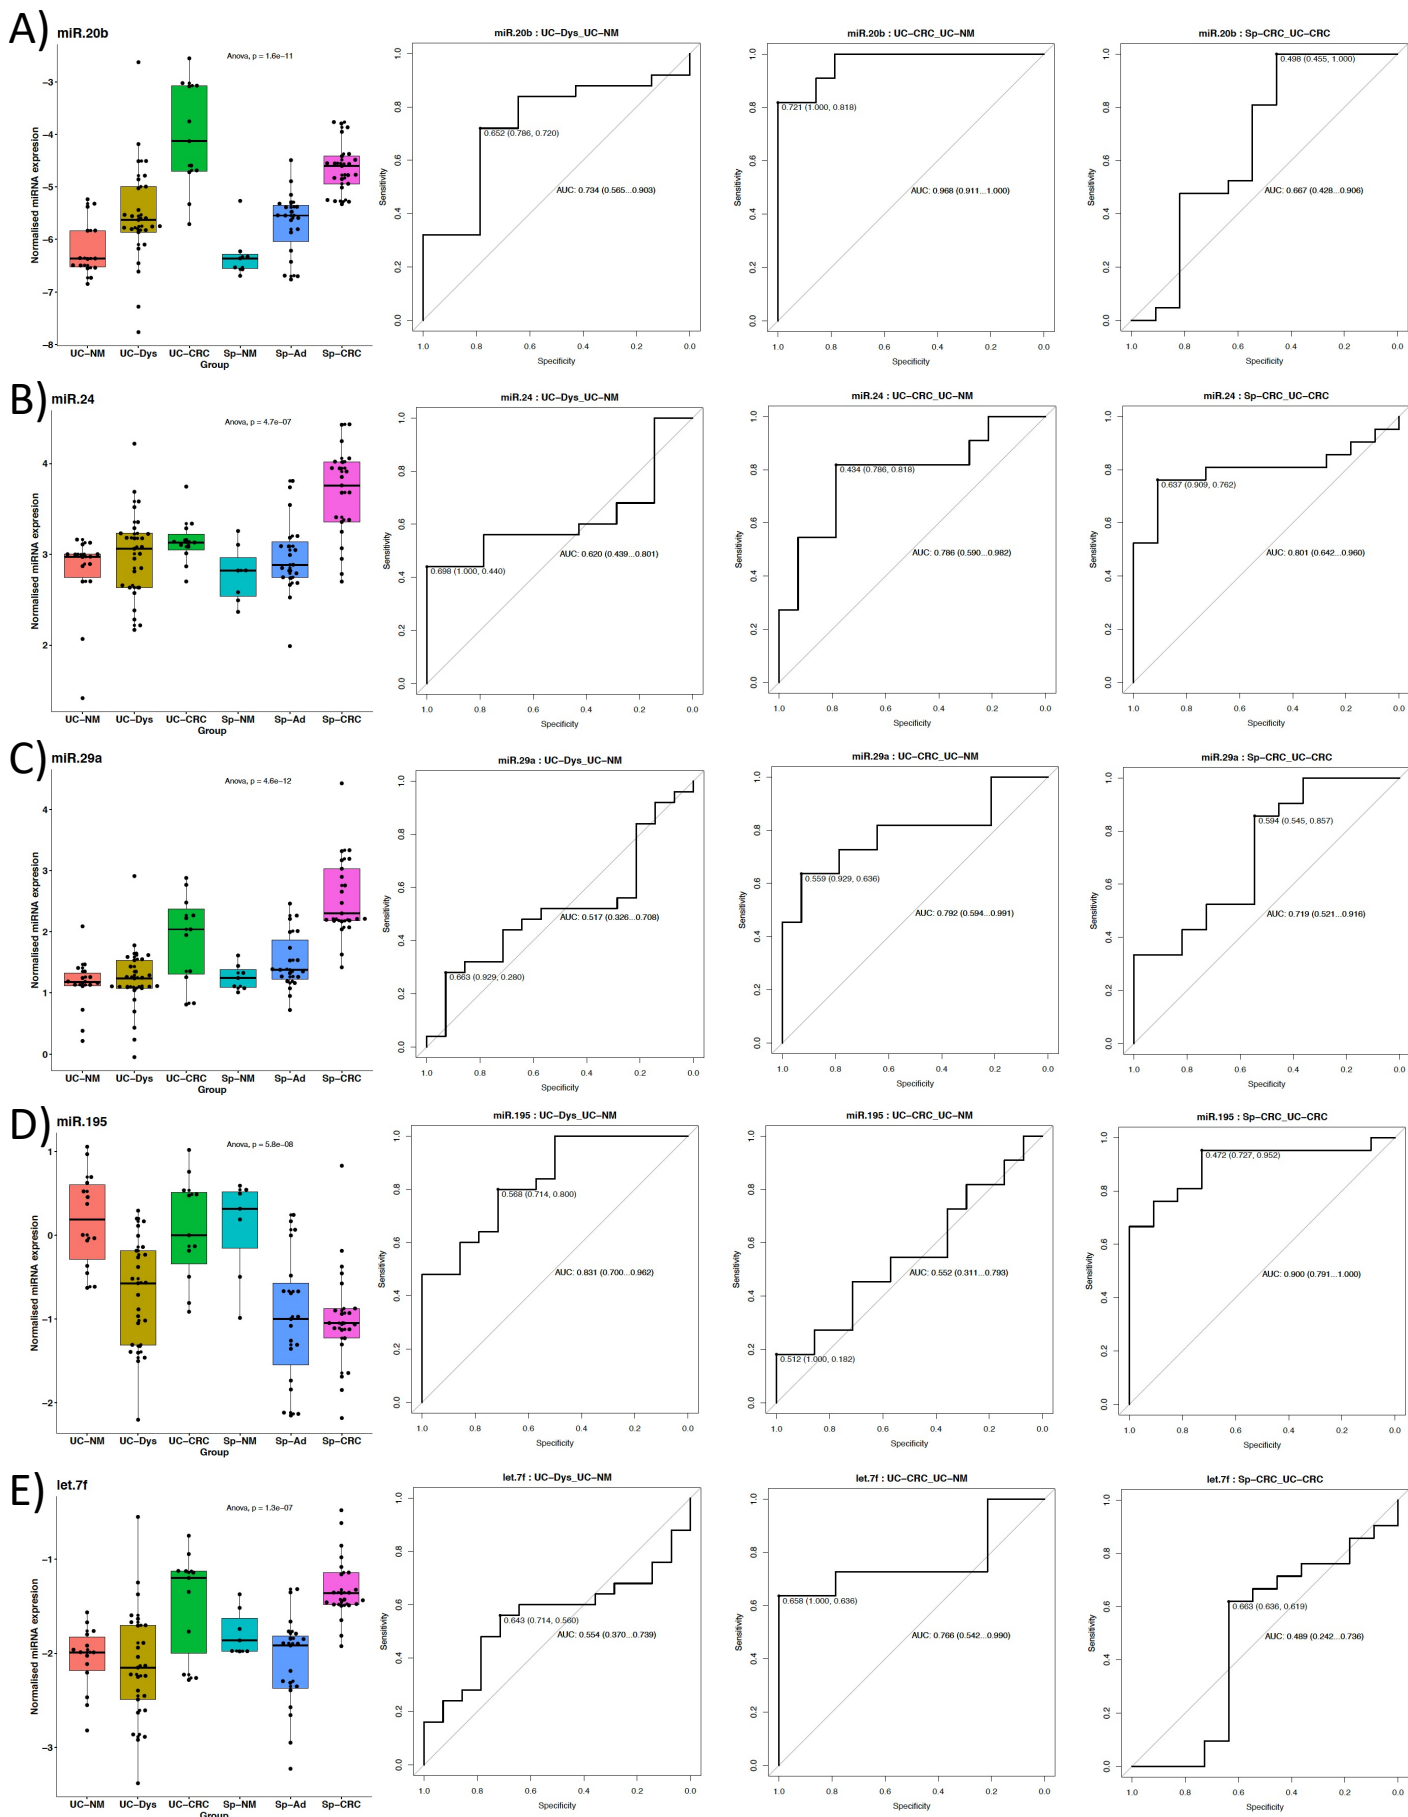

**Supplementary Figure S5.** Left column: Box- and Whisker Plots for normalized microRNA expression of miR-20b (A), miR-24 (B), miR-29a (C), miR-195 (D) and miR-let-7f (E) across the Ulcerative Colitis (UC-) associated and Sporadic (Sp-) CRC sequences. The following three columns show the receiver operating characteristic curves (ROC) including the area under de curve (AUC) value for differentiating UC-associated dysplasia from normal mucosa (left), UC-associated CRC from normal mucosa (middle) and sporadic CRC from UC-associated CRC (right).
